# Supplementary material for: Two modes of gypsum replacement by carbonate and native sulfur in the Lorca Basin, SE Spain
Source: Frontiers journal article supplement (doi:10.3389/feart.2023.1153415), 2023-05-12
Supplement: Table_1.XLSX [file Table_1.XLSX]

## Sheet: Sheet1
	Laminated			Brecciated (1)			Brecciated (2)
	δ13C	σ	ng/g rock	δ13C	σ	ng/g rock	δ13C	σ	ng/g rock
Desulfurized
Norpristane	-15.7517	0.294028	12.9095	n/a
Pristane	n.d.		9.18332	n.d.		2.5092
Phytane	-16.9557	0.306193	152.784	-19.7713	0.375533	26.8678
Squalane	n.d.		2.72615	n.d.		1.78504
∑ all isoprenoids			177.603			31.162
5β, 14α, 14β methyl C27 sterane	-16.5423	0.266691	23.4155	-14.8217	0.198155	14.986
5α, 14α, 14β methyl C27 sterane	-17.325	0.287757	98.5667	-15.3353	0.132926	82.9996					*	co-eluting with another compound in the laminated carbonate
5α, 14β, 17a, 14a methyl C28 sterane	-18.0437	0.307677	7.28113	n.d.		2.07332					**	co-eluting with another compound in in the brecciated carbonates
5α, 14α, 17β, 14β methyl C29 sterane	-14.9783	0.277428	20.5598	-12.9533	0.762198	8.88829					n.q.	not quantified
5α, 14α, 17β, 14α methyl C29 sterane	-15.3737	1.19453	9.5843	n/a							n/a	not applicable
5α, 14α, 14α methyl C29 sterane	-15.7837	0.758387	23.5109	n/a							n.d.	n.d.
5α, 14α, 17β, 14β methyl C29 sterane	-18.043	0.586811	21.017	-21.142	0.809601	4.62634
Dinosterane	-18.4523	0.515389	8.9486	n/a
∑ all steranes			212.884			113.574
ββ C34 hopane	n/a			-73.501	0.98723	5.535
Hydrocarbons
C15	n.d.		50.4733	n/a
C17*,**	-25.946	0.213546	144.757	n/a
C18*	-29.169	1.4623	27.4289	n/a
C19	-25.5795	0.661145	35.5937	n/a
C23	-22.5595	1.03167	35.5074	-16.8865	0.634275	5.14879
C24	n/a			-21.075	0.561443	4.69321
C25	-20.5925	0.621547	53.2697	-21.3585	0.303349	13.7253
C27	-20.9515	0.0233345	90.089	-22.426	0.319612	10.1602
C29	-25.465	4.31477	53.3388	-27.5965	0.122329	13.6747
C30	n/a			n.d.		2.89981
C31	-27.828	0.35921	66.5613	-29.005	0.268701	22.4681
C33	-20.8865	0.779939	33.9711	-27.164	0.16122	15.5476
∑ all n-alkanes			590.99			88.3177
8-methyl MTTC	n.d.		5.61007	n/a
6-methyl MTTC	n.d.		16.157	n/a
7,8-dimethyl MTTC	n.d.		7.07731	n/a
5,7,8-trimethyl MTTC	n.d.		7.3535	n/a
Farnesane	n.d.		12.9118	n/a
Norpristane	n.d.		31.7271	n/a
Pristane*,**	-18.365	2.28537	132.208	n.d.		5.32234
Phytane	-20.599	0.145664	617.694	-14.96	0.0480833	39.5994
∑ Phytenes	-27 to -16		212	n/a
Squalane*	-18.133	0.521845	14.8969	-39.414	0.763675	7.2893
PMI*	n.d.		28.689	-87.8485	0.232638	20.8844
∑ all isoprenoids			1050.13			73.0955
∑ Phytane (iC20) thiophenes	-20 to -18		226.491	-17 to -12		59.6233
∑ PMI (iC25) thiophenes	-18		145.188	n/a
∑ sulfurized C20 HBI's	n.d.		55.065	-18 to -15		14.1592
∑ sulfurized C25 HBI's	-21 to -19		421.549	-23 to -20		6.96388
∑ Alkyl and isoprenoid thiophenes, thiolanes and thianes	-21 to -13		1274.54	-23 to -12		116.947
∑ Alkyl benzo[b]thiophenes	-19 to -17		562.491	-20 to -17		132.487
C28 sterane thiolane	n.d.		5.93804	n/a
C29 sterane thiolane	n.d.		33.0562	-16.027	0.25173	8.5548
C27 sterane thiols	n.d.		171.737	n/a
C29 sterane thiol	n.d.		30.467	n/a
methylthio-C29 steranes	n.d.		31.2265	n/a
∑ sulfurized steranes (C27-C29)			272.425			8.5548
∑ sulfurized C35 hopanes	n.d.		52.89	n/a
∑ all organic sulfur compounds			2162.34			257.989
∑ all hydrocarbons			3839.66			169.968
Alcohols
C16	n.d.		59.2685	n.d.		16.3152
C18	n.d.		22.6636	n.d.		24.0986
∑ all n-alcohols			208.644			53.2115
Phytanol	n.d.		306.233	n.d.		48.1224
OH-C16 acid	n/a			n.d.		45.8771
MAGE 1-O-iC20	n/a			n.d.		24.5476
C36 DAGE	n/a			n.d.		30.7077
McDGD A	n.d.		15.8055	n.d.		13.7574
McDGD B	n.d.		16.9888	n.d.		16.8783
McDGD C	n.d.		14.3404	n.d.		21.4641
Archaeol	n.d.		892.601	-42.5468	0.403728	1035.95	-38.03	0.23	n.q.
Macrocyclic Archaeol	n/a			n.d.		89.2959	-65.21	1.12	n.q.
sn2-OH-Archaeol	n/a			n.d.		45.667	-62.36	0.98	n.q.
Extended Archaeol	n.d.		70.0681	n.d.		29.7441	-12.36	0.58	n.q.
∑ all isoprenoid alcohols			1268.9			1273.32
∑ all alcohols			1524.68			1455.22
Ether cleavage
C16	n.d.		49.8628	-67.0983	1.98222	45.3318
10Me-C16	n/a			-75.994	1.44656	49.4716
Phytane	-18.9357	2.16197	column overload	-51.2037	0.929661	column overload
regular PMI	-16.3403	1.33224	73.8661	-14.1003	0.982494	24.8551
McDG A	n.d.		n.d.	n.d.		13.6621
McDG B	n.d.		n.d.	n.d.		14.9213
McDG C	n.d.		n.d.	n.d.		19.6866
bp-0	n.d.		16.3942	-81.3263	0.750688	291.266
bp-1	n/a			-86.123	0.460258	30.7397
bp-2	n/a			-83.9305	0.75024	20.8306
Fatty acids
C13	-25.2114	0.593263	124.977	n/a
C14	-22.5848	0.494268	305.565	-23.4961	0.684479	28.6344
C15	-23.3368	0.717713	223.285	n.d.		17.5814
C16	-25.0708	0.340118	2448.73	-29.617	0.402587	260.108
C17	-24.9135	1.11794	547.948	n.d.		12.5408
C18	-23.8789	0.141421	9687.39	-31.3853	1.02358	218.811
C19	-23.5311	0.533866	1782.45	n.d.		12.2068
C22	-22.5439	0.126572	20008	-21.9774	0.584719	164.731
C23	-31.7793	0.00565685	1551.97	-23.6903	0.723716	27.693
C26	-25.4549	0.361332	4354.64	-22.9478	0.422474	841.783
C28	-22.5089	0.066468	9649.57	-23.3448	0.709323	393.958
C29	-25.7181	0.306177	239.732	-21.951	0.613743	7515.38
C31	n.d.		84.3417	n.d.		14.636
C32	-23.5015	0.653367	284.658	-23.9599	0.897319	57.9671
∑ all n-fatty acids			73496.4			10358.9
∑ C18 thiophenic acids	n.d.		180.672	n/a
iso-C13	n.d.		67.5575	n.d.		3.70455
ai-C13	n.d.		18.6351	n/a
iso-C14	n.d.		74.8348	n/a
ai-C14	n.d.		16.1532	n/a
iso-C15	-18.9976	0.730441	512.402	-17.292	0.477297	22.8042
ai-C15	n.d.		69.156	n.d.		9.10955
iso-C16	-18.4875	0.00777817	185.047	n.d.		13.6643
ai-C16	n.d.		25.9966	n.d.		3.21871
10Me-C16	n.d.		81.7757	n/a
iso-C17*,**	-16.994	0.21496	380.274	-10.9036	0.766504	60.5785
ai-C17	n.d.		75.4658	n.d.		11.5691
iso-C19	n.d.		21.3694	n/a
ai-C19	n.d.		92.7128	n/a
iso-C20	-17.5687	0.0890955	153.203	n/a
∑ all branched fatty acids			1774.58			124.649
2,6,10-trimethyl-C11	-17.2636	0.661852	163.131	n/a
Farnesic	-16.9949	0.524673	245.706	n.d.		8.16823
4,8,12-trimethyl-C13	-17.4888	0.621547	327.103	n.d.		13.3303
5,9,13-trimethyl-C14	-16.7256	1.00056	168.852	n.d.		6.49815
Pristanoic*,**	-16.994	0.21496	650.84	-10.9036	0.766504	60.5785
Phytanic	-15.5154	0.738927	1327.76	-15.6457	0.263896	881.47
4,8,12-trimethyl-C18	-15.4272	0.241123	589.256	n/a
PMI	n.d.		74.288	n.d.		37.7135
∑ all multi-methyl branched fatty acids			3546.94			1007.76
αβ C31 hopanoic	n.d.		13.9237	n/a
αβ C32 hopanoic	n.d.		174.867	n/a
αβ C32 hopanoic	n.d.		30.2452	n/a
αβ C33 hopanoic	n.d.		40.9299	n/a
ββ C32 hopanoic	-24.6523	0.240416	211.548	n/a
αβ C34 hopanoic	n.d.		22.5051	n/a
ββ C33 hopanoic	n.d.		114.124	n/a
αβ C35 hopanoic	n.d.		35.5876	n/a
ββ C34 hopanoic	n.d.		34.2835	n/a
ββ C35 hopanoic	n.d.		38.1956	n/a
∑ all hopanoic acids			716.21
bp-0	n/a			-64.185	0.757311	62.5522
∑ all fatty acids			79714.8			11553.8
